# Supplementary material
Source: Springer Nature journal article supplement (https://www.springermedizin.de/resource/supplementary/12936_2012_2489_MOESM7_ESM.pdf/9542768)

a) Confirmed cases/1000, East province

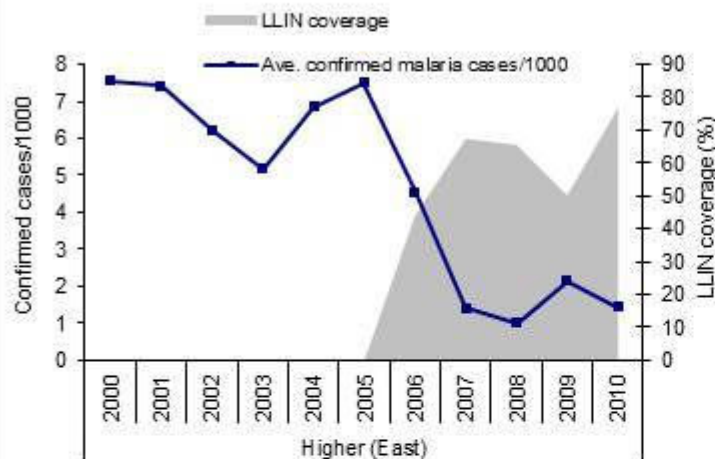

b) Confirmed cases/1000, other provinces

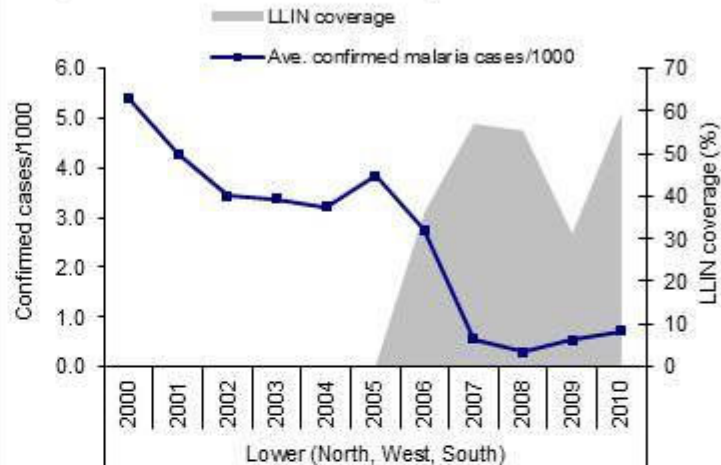

c) SPR, East province

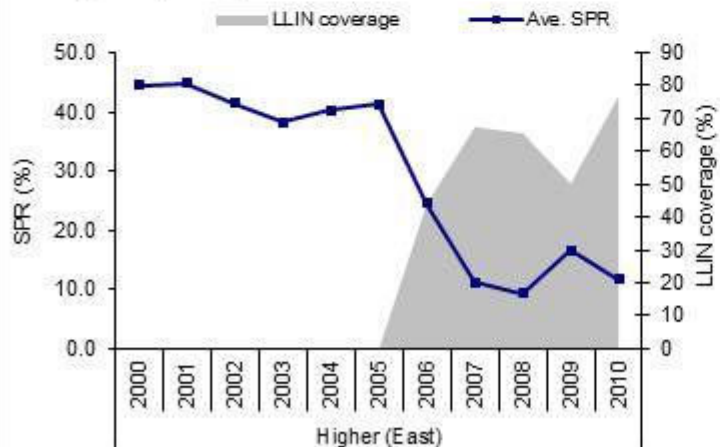

d) SPR Other provinces

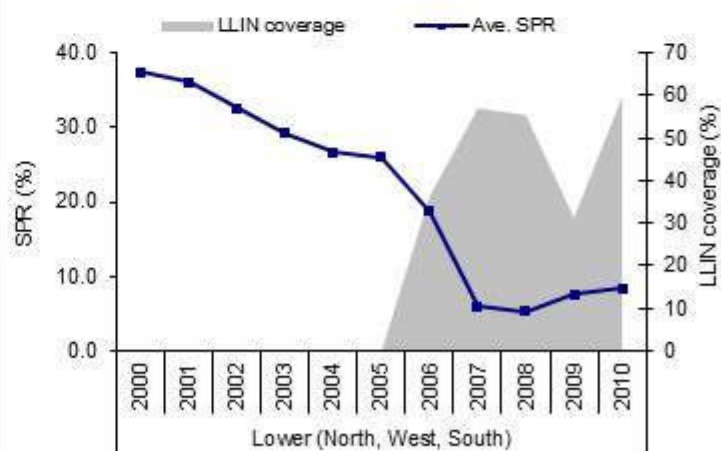

Supplement: MOESM7 [file 9542768]
